# Supplementary material
Source: PubMed Central journal article supplement (PMC5567992)

Figure 3b

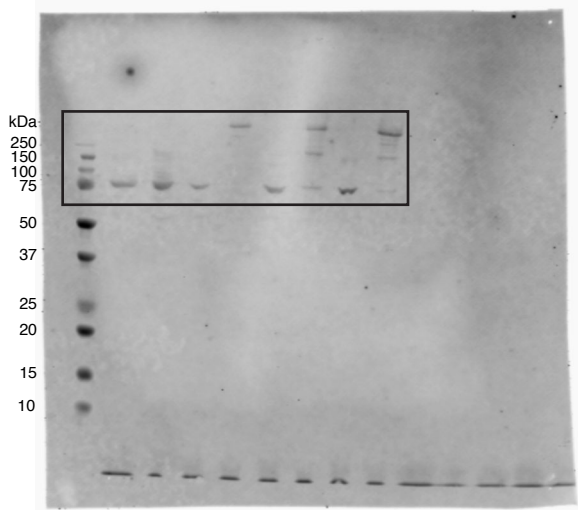

Extended data figure 6a

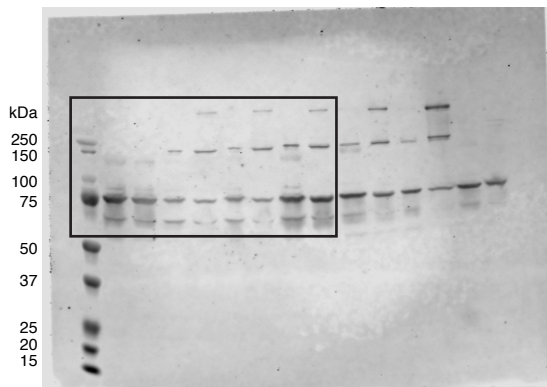

Extended data figure 6c

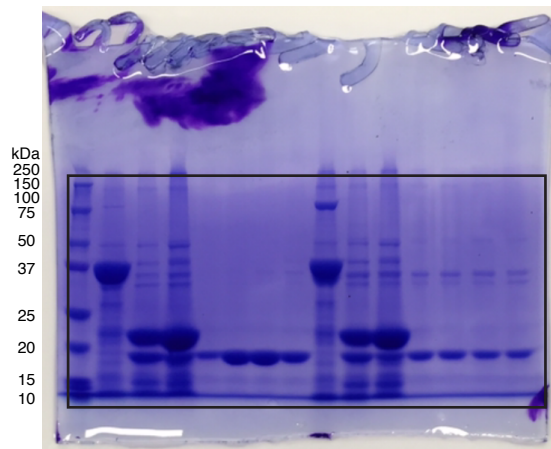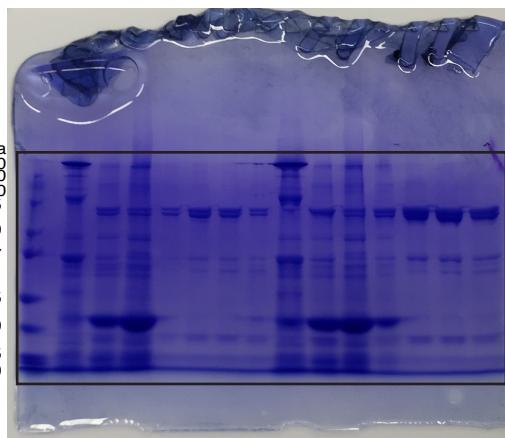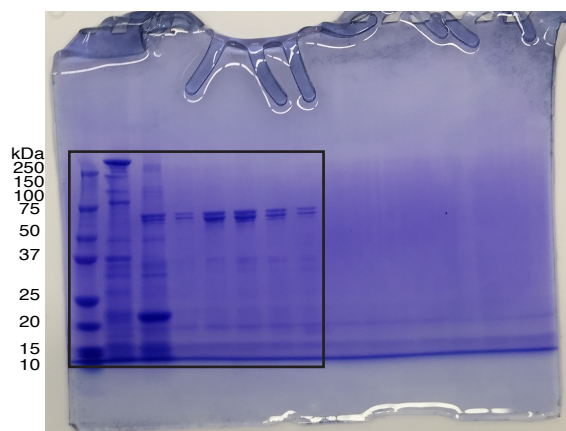

Supplement: NIHMS859113-supplement-supp_fig1.pdf [file NIHMS859113-supplement-supp_fig1.pdf]
